# Supplementary material for: Dissolution and transesterification of cellulose in γ-valerolactone promoted by ionic liquids
Source: Royal Society of Chemistry journal article supplement (doi:10.1039/c8nj03505a), 2018-11-17
Supplement: c8nj03505a1.pdf [file c8nj03505a1.pdf]

## Dissolution and Transesterification of Cellulose in $\gamma$ -valerolactone Promoted by Ionic Liquids

Chaoping Yuan,<sup>a</sup> Wentao Shi,<sup>b</sup> Peng Chen,<sup>b</sup> Lihua Zhang,<sup>a</sup> Gang Hu,<sup>a</sup> Longming Jin,<sup>a</sup> Haibo Xie,<sup>\*a</sup> Qiang Zheng,<sup>a</sup> Shengjun Lu<sup>\*a</sup>

<sup>a</sup>Department of Polymer Materials and Engineering College of Materials and Metallurgy, Guizhou University, Huaxi District, Guiyang, 550025, PR.China

<sup>b</sup>Ningbo Key Laboratory of Polymer Materials, Zhejiang Key Laboratory of Marine Materials and Protective Technologies, Ningbo Institute of Materials Technology and Engineering (NIMTE), Chinese Academic of Science, Ningbo 315201, P.R.China

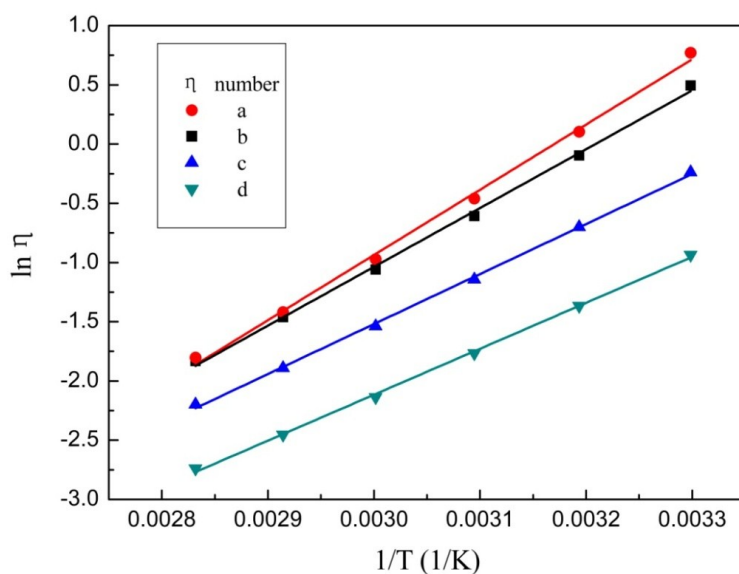

**Fig.S1** Arrhenius equation plots for different  $X_{ILs}$  in the OESs: a ( $X_{ILs} = 1.0$ ), b ( $X_{ILs} = 0.8$ ), c ( $X_{ILs} = 0.6$ ), d ( $X_{ILs} = 0.4$ ), respectively, at 4 wt% cellulose concentration. Solid lines are fit lines ( $R^2 \geq 99.6\%$ ).

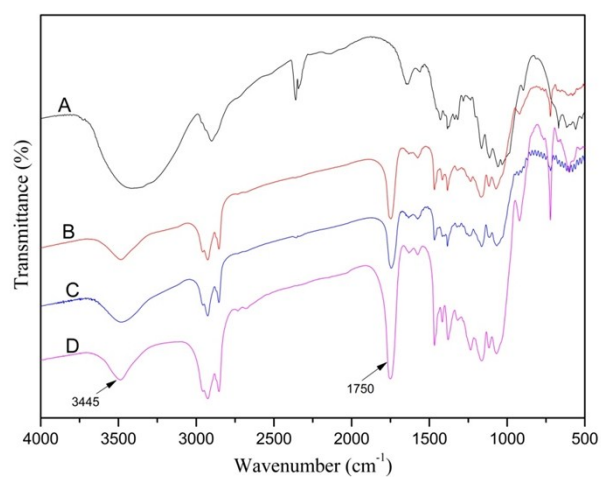

**Fig.S2** FT-IR spectra of  $\alpha$ -cellulose (spectrum A) and  $\alpha$ -cellulose ester CE-2, (spectrum B); CE-1, (spectrum C); CE-3, (spectrum D, DS = 3.00).

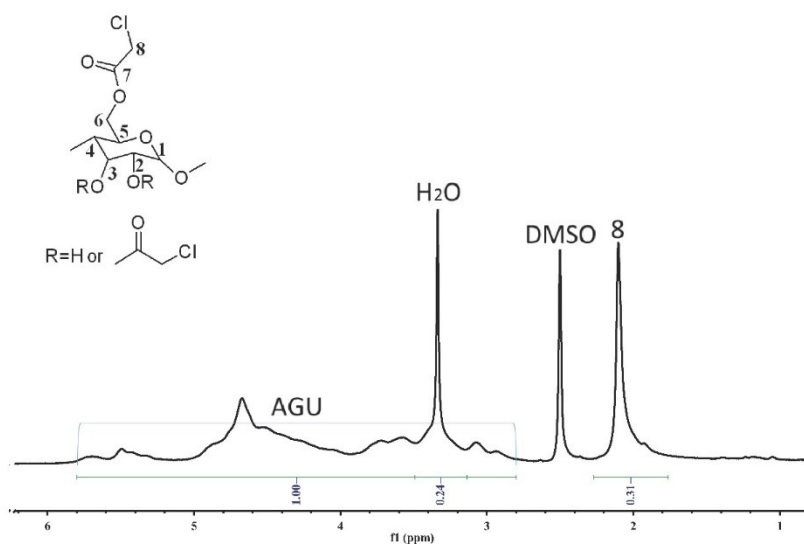

**Fig.S3** <sup>1</sup>H-NMR spectrum of  $\alpha$ -cellulose chloroacetate sample CE-4 (DS = 1.43) in DMSO-d<sub>6</sub>. Reaction conditions: 10 wt%  $\alpha$ -cellulose solution, vinyl chloroacetate /AGU = 3:1, 80°C, 4h.

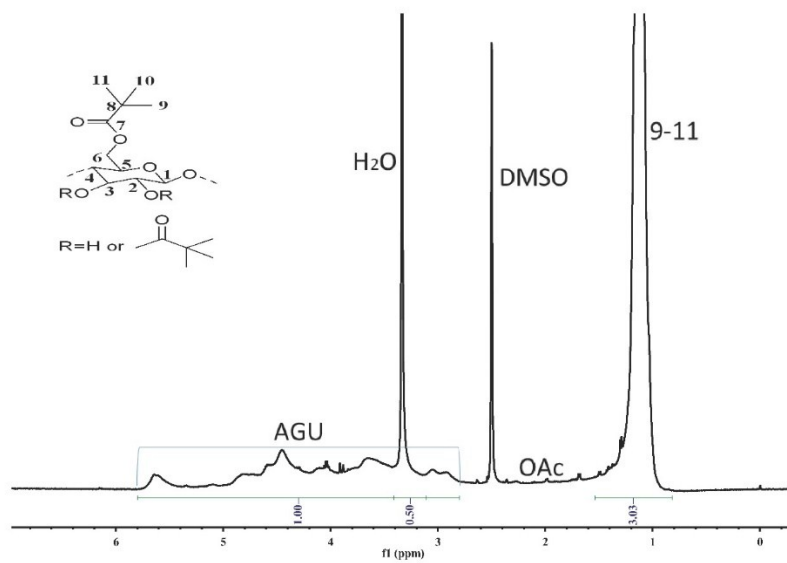

**Fig.S4** <sup>1</sup>H-NMR spectrum of α-cellulose pivalate sample CE-5 (DS = 3.00) in DMSO-d<sub>6</sub>. Reaction conditions: 10 wt% cellulose solution, vinyl pivalate/AGU = 3:1, 80°C, 4h. The “OAc” marked peak belongs to the α-carbon of additional bounded acetate esters.
